# Supplementary material for: Efficacy of parent-mediated communication-focused treatment in toddlers with autism (PACT) delivered via videoconferencing: a randomised controlled trial study protocol
Source: PubMed Central journal article supplement — BMJ Open. 2021 Apr 7;11(4):e044669. doi: 10.1136/bmjopen-2020-044669 (PMC8031029; doi:10.1136/bmjopen-2020-044669), 2021-04-07
Supplement: bmjopen-2020-044669supp002.pdf [file bmjopen-2020-044669supp002.pdf]

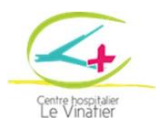

Code promoteur : IFPAD

**Formulaire de recueil de consentement de participation à une recherche****Titre : Efficacité sur la sévérité des signes autistiques du jeune enfant avec un trouble du spectre autistique d'une intervention développementale conduite par les parents formés par visioconférence (IFPAD).****Investigateur coordonnateur : Dr Marie-Maude GEOFFRAY****Promoteur : CH Le Vinatier**

95 Boulevard Pinel

69677 BRON CEDEX

Je soussigné représentant légal n°1 : NOM et Prénom : \_\_\_\_\_ Je  
soussigné représentant légal n°2 : NOM et Prénom : \_\_\_\_\_

De l'enfant : NOM et prénom du mineur : \_\_\_\_\_  
Né(e) le :     /     /     à (ville et code postal) : \_\_\_\_\_  
Demeurant : \_\_\_\_\_

Déclare : que le Dr \_\_\_\_\_, nous a proposé de faire participer notre enfant à l'étude sus  
nommée,

-qu'il nous a expliqué en détail le protocole,

-qu'il nous a notamment fait connaître :

- L'objectif, la méthode et la durée de l'étude
- Les contraintes et les risques potentiels encourus
- mon droit de refuser de participer et en cas de désaccord de retirer mon consentement à tout moment
- notre obligation d'inscription à un régime de sécurité sociale pour mon enfant
- que, si nous le souhaitons, à son terme, nous serons informés par le médecin investigateur de ses résultats globaux
- que le comité de Protection des Personnes Sud-est III a émis un avis favorable en date du 30/10/2018 et a accepté l'amendement de la version N° 5 du protocole en date du 25 octobre 2019.
- que l'ANSM a été informée de la mise en place de cette étude
- que dans le cadre de cette étude le promoteur, le CH le Vinatier, a souscrit à une assurance couvrant cette recherche : Assurance SHAM, 18 rue Edouard Rochet, 69372 LYON CEDEX 08

-que nous avons répondu en toute bonne foi aux questions concernant l'état de santé de notre enfant et sa participation à d'autres études.

Les informations relatives à l'étude recueillies par l'investigateur sont traitées confidentiellement. J'accepte que les données enregistrées au cours de l'étude puissent faire l'objet d'un traitement informatisé conformément à la méthodologie MR001 de la Commission Nationale de l'Informatique et des Libertés (CNIL). Nous avons pris connaissance que le Centre Hospitalier Le Vinatier est responsable de nos informations personnelles recueillies dans le cadre de l'étude IFPAD et que ces informations peuvent être conservées pendant 15 ans. Nous avons bien noté que nous disposons d'un droit d'accès et de rectification, d'effacement et d'opposition au traitement des données nous concernant à tout moment de l'étude auprès

Version 5 du 25 octobre 2019

Centre Hospitalier le Vinatier – Service de la Recherche - BP 300 39 – 95 bd Pinel  
69 678 Bron cedex

1

du Dr GEOFFRAY, 04.37.91.52.56 ou auprès du responsable de la protection des données du CH Le Vinatier en le contactant à l'adresse mail : [fabien.joubert@ch-le-vinatier.fr](mailto:fabien.joubert@ch-le-vinatier.fr) ou par téléphone au 04.37.91.54.40, dans le respect de la loi « informatique et liberté » (loi du 6 janvier 1978) et du règlement Général à la protection des données (RGPD) entré en vigueur le 25 mai 2018.

Si nous ne sommes pas satisfaits des réponses que nous avons obtenues, nous pouvons nous adresser à la Commission Nationale de l'Informatique et des Libertés (CNIL) en utilisant le lien : <https://www.cnil.fr/>

Nous pouvons également contacter les médecins suivants : Dr GEOFFRAY, 04.37.91.52.56 en cas d'événement indésirable et pour tout renseignement concernant ma participation à l'étude et en cas de problème médical survenu pendant l'étude.

**Après avoir discuté librement et obtenu réponse à toutes nos questions, nous acceptons librement et volontairement de faire participer notre enfant à cette recherche dans les conditions précisées dans le formulaire d'information et de consentement.**

|                                                                                                                                           |                                                                  |
|-------------------------------------------------------------------------------------------------------------------------------------------|------------------------------------------------------------------|
| Nom et prénom du représentant légal n° 1<br>Signature précédée de la mention « <b>lu et compris</b> »<br><br>Date :    /    / Signature : | Nom de l'investigateur :<br><br><br>Date :    /    / Signature : |
| Nom et prénom du représentant légal n° 2<br>Signature précédée de la mention « <b>lu et compris</b> »<br><br>Date :    /    / Signature : |                                                                  |

Document réalisé en 2 exemplaires originaux (dont le premier doit être gardé 15 ans par l'investigateur, et un autre remis aux parents).
